# 1 **More comprehensive proprioceptive stimulation of the hand amplifies** 2 **its cortical processing**

3 Maria Hakonen<sup>1,2\*</sup>, Timo Nurmi<sup>1,2</sup>, Jaakko Vallinoja<sup>2</sup>, Julia Jaatela<sup>2</sup> Harri Piitulainen<sup>1,2,3</sup>

4 \*correspondence

5 <sup>1</sup>Department of Sport and Health Science, University of Jyväskylä, Jyväskylä, Finland

6 <sup>2</sup>Department of Neuroscience and Biomedical Engineering, Aalto University, Finland

7 <sup>3</sup>Aalto NeuroImaging, Magnetoencephalography Core, Aalto University School of Science, Espoo,  
8 Finland

9 **Corresponding author: Maria Hakonen, email: [maria.h.hakonen@jyu.fi](mailto:maria.h.hakonen@jyu.fi), Tel.: +358 50 382**  
10 **3008**

## 11 **ABSTRACT**

12 Corticokinematic coherence (CKC) quantifies the phase coupling between limb kinematics and  
13 cortical neurophysiological signals reflecting proprioceptive feedback to the primary sensorimotor  
14 (SM1) cortex. We studied CKC to proprioceptive stimulation (*i.e.* movement-actuator-evoked  
15 movements) of right-hand digits (index, middle, ring and little) performed simultaneously or  
16 separately. CKC was computed between magnetoencephalography (MEG) and finger acceleration  
17 signals. The strongest CKC was obtained by stimulating the fingers simultaneously at fixed 3-Hz  
18 frequency, and can, therefore, be recommended as design for fast functional localization of the hand  
19 area in the primary sensorimotor (SM1) cortex using MEG. The peaks of CKC sources were  
20 concentrated in the hand region of the SM1 cortex, but did not follow consistent somatotopic order.  
21 This result suggests that spatial specificity of MEG is not sufficient to separate proprioceptive finger  
22 representations of the same hand adequately or that their representations are overlapping.

## 23 **Introduction**

24 Corticokinematic coherence (CKC) quantifies the phase coupling between limb kinematics (e.g. hand  
25 acceleration or contractile force, Piitulainen et al., 2013a) and cortical neurophysiological signals  
26 measured with magnetoencephalography (MEG, Piitulainen et al., 2013b) or electroencephalography  
27 (EEG) in adults (Piitulainen et al., 2020) and even in infants (Smeds et al., 2017). CKC peaks at the  
28 movement frequency and its harmonics in the primary sensorimotor cortex (SM1) contralateral to the  
29 moving limb (Bourguignon et al., 2011; Jerbi et al., 2007). CKC is strong for repetitive finger  
30 (Piitulainen et al., 2013b), toe (Piitulainen et al., 2015) and ankle (Piitulainen et al., 2018b)  
31 movements, and follows the respective somatotopic cortical representations. Thus, CKC is a robust  
32 tool to pinpoint, e.g., functional hand representation (Bourguignon et al., 2013b), that can be valuable  
33 information when planning a brain surgery. CKC has shown to activate the SM1 cortex similarly in  
34 different rates (~1–12 Hz) of voluntary (Marty et al., 2015) and movement-actuator induced hand  
35 movements (Piitulainen et al., 2015), with no differences in the CKC strength or source location.

36 CKC primarily reflects somatosensory afference to the SM1 cortex (Bourguignon et al., 2015;  
37 Piitulainen et al., 2013b), since active (volitional) and passive (evoked by an investigator) movements  
38 elicited similar strength and cortical location of CKC. Moreover, CKC is not affected by the level of  
39 tactile contamination, and the cortical CKC source is spatially distinct from the tactile source in of  
40 the same finger (Piitulainen et al., 2013b). These observations suggest that CKC primarily reflects  
41 proprioceptive afference (presumably from the muscle spindles) to the SM1 cortex arising from the  
42 rhythmic movement (Bourguignon et al., 2015; Piitulainen et al., 2013b). Thus, CKC can be used to  
43 quantify degree or extent of cortical proprioceptive processing, and may be utilized to identify  
44 impairments in proprioceptive pathways in various motor disorders (e.g. Marty et al., 2019) or in  
45 healthy aging (Piitulainen et al., 2018b). Finally, CKC has shown to be a reproducible tool to follow  
46 cortical proprioception at group level both for MEG and EEG (Piitulainen et al., 2018a, 2020).

47 The primary aim of this study was to examine whether the CKC strength or cortical source location  
48 differs between proprioceptive stimulation (*i.e.* movement-actuator-evoked movements) of the right-  
49 hand digits (D2–D5: index, middle, ring and little). We aimed to determine whether a comprehensive  
50 multi-finger stimulation would improve robustness and time efficiency of CKC based functional  
51 localization of the hand SM1 cortex using MEG. Three conditions were tested: (1) simultaneous  
52 stimulation of all four fingers at 3-Hz frequency (*simultaneous*<sub>constant-*f*</sub>), (2) stimulation of each finger  
53 separately at 3-Hz frequency (*separate*) and (3) simultaneous stimulation of the fingers at finger-  
54 specific frequencies (at 2, 2.5, 3 and 3.5 Hz, *simultaneous*<sub>varied-*f*</sub>).

55 We had four hypotheses. The first hypothesis (H1) was that the simultaneous stimulation of the four  
56 fingers would result in stronger CKC due to stronger proprioceptive afference to the SM1 cortex  
57 compared to the separate-finger stimulation. The second hypothesis (H2) was that the strength of  
58 CKC is similar both for *simultaneous*<sub>varied-*f*</sub> and *separate* conditions, because the stimulation of the  
59 finger at a finger-specific frequency is analogous to stimulating the finger separately. The benefit here  
60 is that *simultaneous*<sub>varied-*f*</sub> approach would provide more time efficient CKC recording if cortical  
61 representations or CKC values of individual fingers are of interest (*e.g.* in specific clinical conditions).  
62 The third hypothesis (H3) was that the most dexterous index finger, with presumably larger cortical  
63 proprioceptive representation in the SM1 cortex, would show the strongest CKC, and the least  
64 dexterous ring finger the weakest CKC (for studies comparing finger dexterity, see Aoki et al., 2003;  
65 Häger-Ross and Schieber, 2000; Ingram et al., 2008; Kinoshita et al., 1996; Reilly and Hammond,  
66 2000; Swanson et al., 1974; Zatsiorsky et al., 1998). Finally, the fourth hypothesis (H4) was that the  
67 cortical source location does not vary significantly between fingers in our healthy participants, and  
68 thus each finger representation would similarly represent the hand region of the SM1 cortex when  
69 assessed with MEG.

70 **Results**

71 Figure 1 shows the movement actuator as well as averaged MEG and acceleration signals measured  
72 during proprioceptive stimulation for a representative participant in three experimental conditions.  
73 We included only successful recordings of participants with clear CKC topographies and  
74 statistically significant ( $p < 0.05$ ) CKC peaking at the stimulation frequency in the final analysis ( $n$   
75 = 16–18 participants depending on the condition). The assumptions of normality or sphericity were  
76 not violated in the data. As expected, the results from sensor and source level analyzes were  
77 replicated well at the individual level. There were no systematic between-finger or between-  
78 condition differences in the MEG gradiometer (sensor) pair in which CKC peaked. CKC peaked in  
79 MEG422-MEG423 gradiometer pair (50% of the cases) or in a gradiometer pair just adjacent to it.

a **Four-finger proprioceptive stimulator**

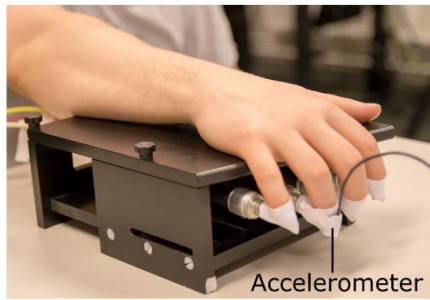

b **Simultaneous stimulation at 3 Hz**

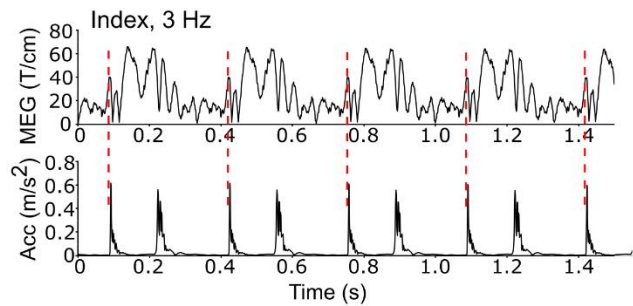

c **Separate stimulation at 3 Hz**

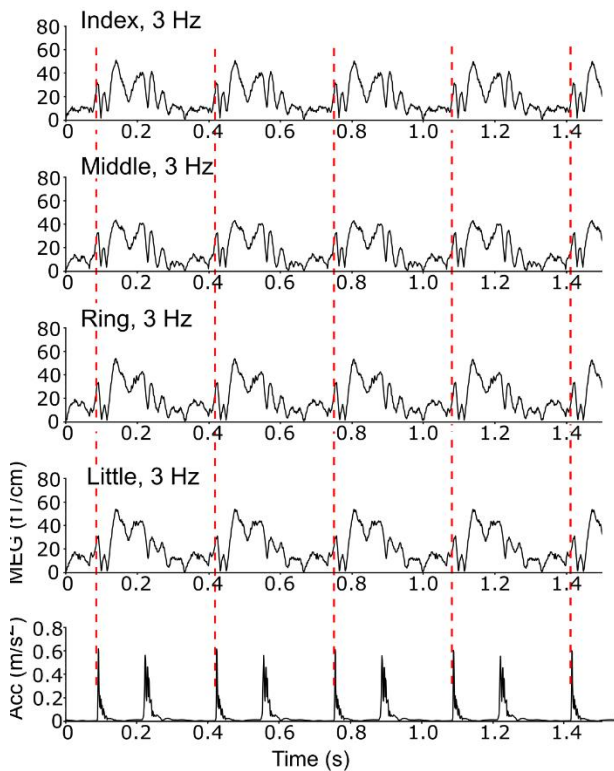

d **Simultaneous stimulation at finger-specific frequencies**

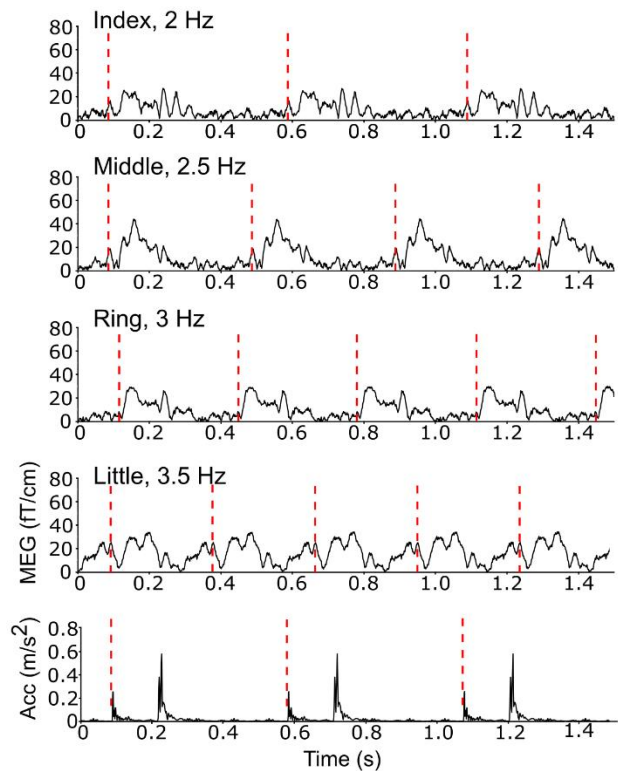

80

81 **Figure 1.** Proprioceptive stimulator, sustained-MEG fields for each finger and acceleration magnitude for the  
82 index finger. (a) The four-finger proprioceptive stimulator. Please, note that the figure is only for visualization  
83 purposes and does not include all four accelerometers. (b–d) Averaged MEG responses (vector sum of the  
84 peak gradiometer pair) for each finger and acceleration magnitude (Euclidean norm of the three orthogonal  
85 components) for the index finger in all three conditions. The red dashed line indicates an onset of the flexion  
86 phase of the continuous flexion-extension movement.

87

88

89 **Stronger CKC to simultaneous than separate-finger stimulation at 3 Hz (H1)**

90 The total number of accepted trials did not differ significantly between the conditions  
 91 (*simultaneous*<sub>constant-f</sub>:  $417 \pm 32$ , *separate*:  $419 \pm 23$ , two-sample t-test,  $p = 0.79$ ,  $n = 18$ ). **Figure 1a**  
 92 and **Table 1** present CKC strength for simultaneous and separate 3-Hz stimulation both at sensor and  
 93 source levels. In line with our first hypothesis, CKC was stronger when the fingers were stimulated  
 94 simultaneously than when they were stimulated separately, presumably reflecting stronger  
 95 proprioceptive afference to the SM1 cortex. This effect was detected for all fingers.

96 **Table 1.** CKC strength for separate and simultaneous 3-Hz stimulations at sensor and source levels.

| H1 (N=18)           | separate        | simultaneous <sub>constant</sub> | p                | F      | df1 | df2 |
|---------------------|-----------------|----------------------------------|------------------|--------|-----|-----|
| <b>Sensor level</b> |                 |                                  |                  |        |     |     |
| Finger average      | $0.42 \pm 0.03$ | $0.69 \pm 0.03$                  | <b>&lt;0.001</b> | 191.03 | 1   | 17  |
| <i>Interaction</i>  | -               | -                                | 0.05             | 2.76   | 3   | 51  |
| <i>Index</i>        | $0.40 \pm 0.04$ | $0.69 \pm 0.04$                  | <b>&lt;0.001</b> | -      | -   | -   |
| <i>Middle</i>       | $0.37 \pm 0.04$ | $0.69 \pm 0.03$                  | <b>&lt;0.001</b> | -      | -   | -   |
| <i>Ring</i>         | $0.46 \pm 0.04$ | $0.69 \pm 0.03$                  | <b>&lt;0.001</b> | -      | -   | -   |
| <i>Little</i>       | $0.46 \pm 0.04$ | $0.69 \pm 0.03$                  | <b>&lt;0.001</b> | -      | -   | -   |
| <b>Source level</b> |                 |                                  |                  |        |     |     |
| Finger average      | $0.39 \pm 0.02$ | $0.50 \pm 0.02$                  | <b>&lt;0.001</b> | 19.56  | 1   | 17  |
| <i>Interaction</i>  | -               | -                                | <b>&lt;0.01</b>  | 4.47   | 3   | 51  |
| <i>Index</i>        | $0.34 \pm 0.03$ | $0.50 \pm 0.03$                  | <b>&lt;0.01</b>  | -      | -   | -   |
| <i>Middle</i>       | $0.36 \pm 0.03$ | $0.50 \pm 0.03$                  | <b>&lt;0.001</b> | -      | -   | -   |
| <i>Ring</i>         | $0.40 \pm 0.03$ | $0.50 \pm 0.03$                  | <b>&lt;0.001</b> | -      | -   | -   |
| <i>Little</i>       | $0.43 \pm 0.03$ | $0.50 \pm 0.03$                  | <b>&lt;0.001</b> | -      | -   | -   |

97

98

99

100 **Weaker CKC to simultaneous stimulation at finger-specific frequencies than separate**  
101 **stimulation at 3 Hz (H2)**

102 The total number of accepted trials did not differ significantly between the conditions  
103 (*simultaneous*<sub>varied-f</sub> :  $419 \pm 23$  trials and *separate*:  $419 \pm 23$ ,  $n = 16$ ). In contrast to our second  
104 hypothesis, CKC was weaker when the fingers were stimulated simultaneously at the finger-specific  
105 frequencies (**Fig. 2b, Table 2**), indicating that the simultaneous approach is not analogous with the  
106 separate finger stimulation. Furthermore, the reductions in CKC strength were finger-specific (**Fig.**  
107 **2c, Table 2**). CKC was weaker for the index, ring and little fingers, but not for the middle finger in  
108 the *simultaneous*<sub>varied-f</sub> condition. The results were similar at the source level with exceptions that  
109 CKC was weaker also for the middle finger, and no difference was found between the conditions for  
110 the index finger.

**CKC strength at sensor level      CKC strength at source level**

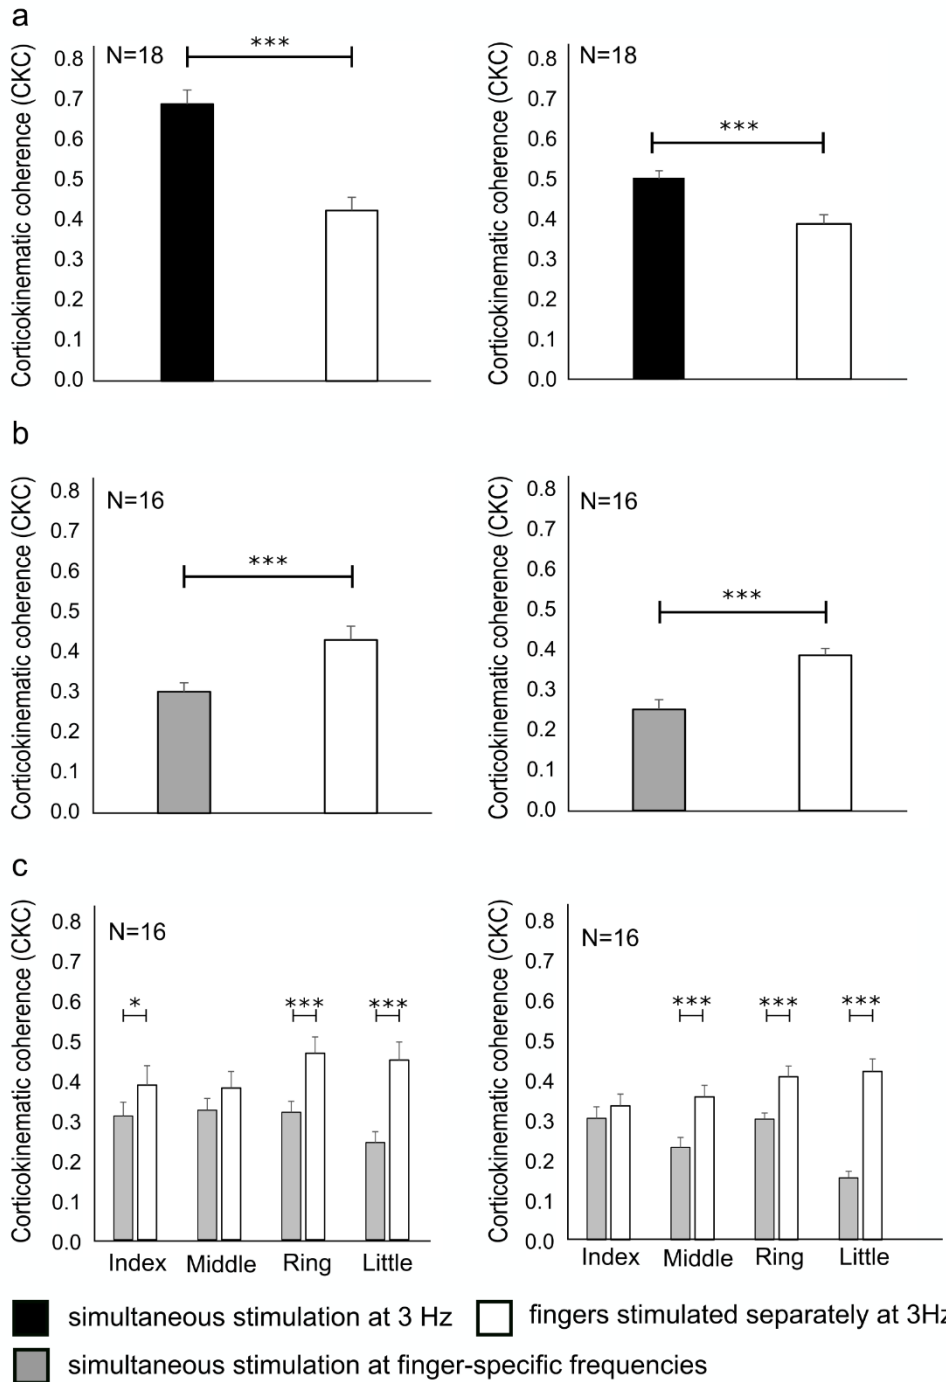

111

112 **Figure 2.** CKC strength for all conditions at the sensor and source levels. Average CKC strength for (a)  
 113 simultaneous *versus* separate stimulation at 3 Hz, (b) simultaneous stimulation at the finger-specific  
 114 frequencies *versus* separate stimulation at 3 Hz, and (c) individual fingers when stimulated simultaneously at  
 115 the finger-specific frequencies and separately. \*  $p < 0.05$ , \*\*  $p < 0.01$ , \*\*\*  $p < 0.001$ .



116 **Table 2.** CKC strength for separate 3-Hz stimulation and simultaneous stimulation at finger-specific  
 117 frequencies.

| H2 (N=16)           | separate    | simultaneous <sub>varied</sub> | p      | F     | df1 | df2 |
|---------------------|-------------|--------------------------------|--------|-------|-----|-----|
| <b>Sensor level</b> |             |                                |        |       |     |     |
| Finger average      | 0.43 ± 0.04 | 0.30 ± 0.02                    | <0.001 | 24.91 | 1   | 15  |
| <i>Interaction</i>  | -           | -                              | <0.001 | 6.45  | 3   | 45  |
| <i>Index</i>        | 0.39 ± 0.05 | 0.31 ± 0.04                    | <0.05  | -     | -   | -   |
| <i>Middle</i>       | 0.38 ± 0.04 | 0.33 ± 0.03                    | 0.054  | -     | -   | -   |
| <i>Ring</i>         | 0.47 ± 0.04 | 0.32 ± 0.03                    | <0.001 | -     | -   | -   |
| <i>Little</i>       | 0.46 ± 0.05 | 0.25 ± 0.03                    | <0.001 | -     | -   | -   |
| <b>Source level</b> |             |                                |        |       |     |     |
| Finger average      | 0.38 ± 0.02 | 0.25 ± 0.02                    | <0.001 | 66.09 | 1   | 15  |
| <i>Interaction</i>  | -           | -                              | <0.001 | 19.56 | 3   | 45  |
| <i>Index</i>        | 0.34 ± 0.03 | 0.31 ± 0.03                    | 0.23   | -     | -   | -   |
| <i>Middle</i>       | 0.36 ± 0.03 | 0.23 ± 0.03                    | <0.001 | -     | -   | -   |
| <i>Ring</i>         | 0.41 ± 0.03 | 0.31 ± 0.02                    | <0.001 | -     | -   | -   |
| <i>Little</i>       | 0.43 ± 0.03 | 0.16 ± 0.02                    | <0.001 | -     | -   | -   |

118

119 **CKC strength reflects finger dexterity and functional dominance (H3)**

120 **Figure 3** shows the CKC strength for individual fingers elicited by separate stimulation and by  
 121 simultaneous stimulation at the finger-specific frequencies (n = 18). In contrast to our third  
 122 hypothesis, the most dexterous index finger did not show the strongest CKC when the fingers were  
 123 stimulated separately. Instead, it seems that the dexterity of the finger decreases CKC. CKC was  
 124 stronger for the ring (0.46 ± 0.04) and little (0.46 ± 0.04) fingers when compared to the middle finger  
 125 (0.37 ± 0.04, p < 0.05, **Fig. 3a**). Similar results were observed at the source-level, where the CKC  
 126 was stronger for the ring (0.41 ± 0.03, p < 0.01) and little (0.43 ± 0.03, p < 0.001) fingers when  
 127 compared to the middle finger (0.36 ± 0.03, **Fig. 3a**). In addition, at the source-level, CKC was

128 stronger also for the ring ( $p < 0.05$ ) and little ( $p < 0.01$ ) fingers when compared to the index finger  
129 ( $0.34 \pm 0.03$ ).

130 When the fingers were stimulated simultaneously at the finger-specific frequencies, the results were  
131 partly in line with our third hypothesis. The more dexterous fingers showed stronger CKC than the  
132 least dexterous little finger. CKC was stronger for the index ( $0.31 \pm 0.04$ ,  $p < 0.02$ , 2 Hz), middle  
133 ( $0.33 \pm 0.03$ ,  $p < 0.03$ , 2.5 Hz) and ring ( $0.32 \pm 0.02$ ,  $p < 0.02$ , 3 Hz) fingers than for the little finger  
134 ( $0.25 \pm 0.03$ , 3.5 Hz, **Fig. 3b**). Again, the source level results were similar: CKC was stronger for the  
135 index ( $0.31 \pm 0.03$ ,  $p < 0.001$ ), middle ( $0.23 \pm 0.03$ ,  $p < 0.004$ ) and ring ( $0.31 \pm 0.02$ ,  $p < 0.001$ )  
136 fingers than for the little finger ( $0.16 \pm 0.02$ , **Fig. 3b**). Moreover, CKC was stronger for the index ( $p$   
137  $< 0.003$ ) and ring ( $p < 0.002$ ) fingers than for the middle finger. In this condition, the CKC strength  
138 likely partly reflects the dominance or contribution of a given finger to the overall hand proprioceptive  
139 processing in the SM1 cortex.

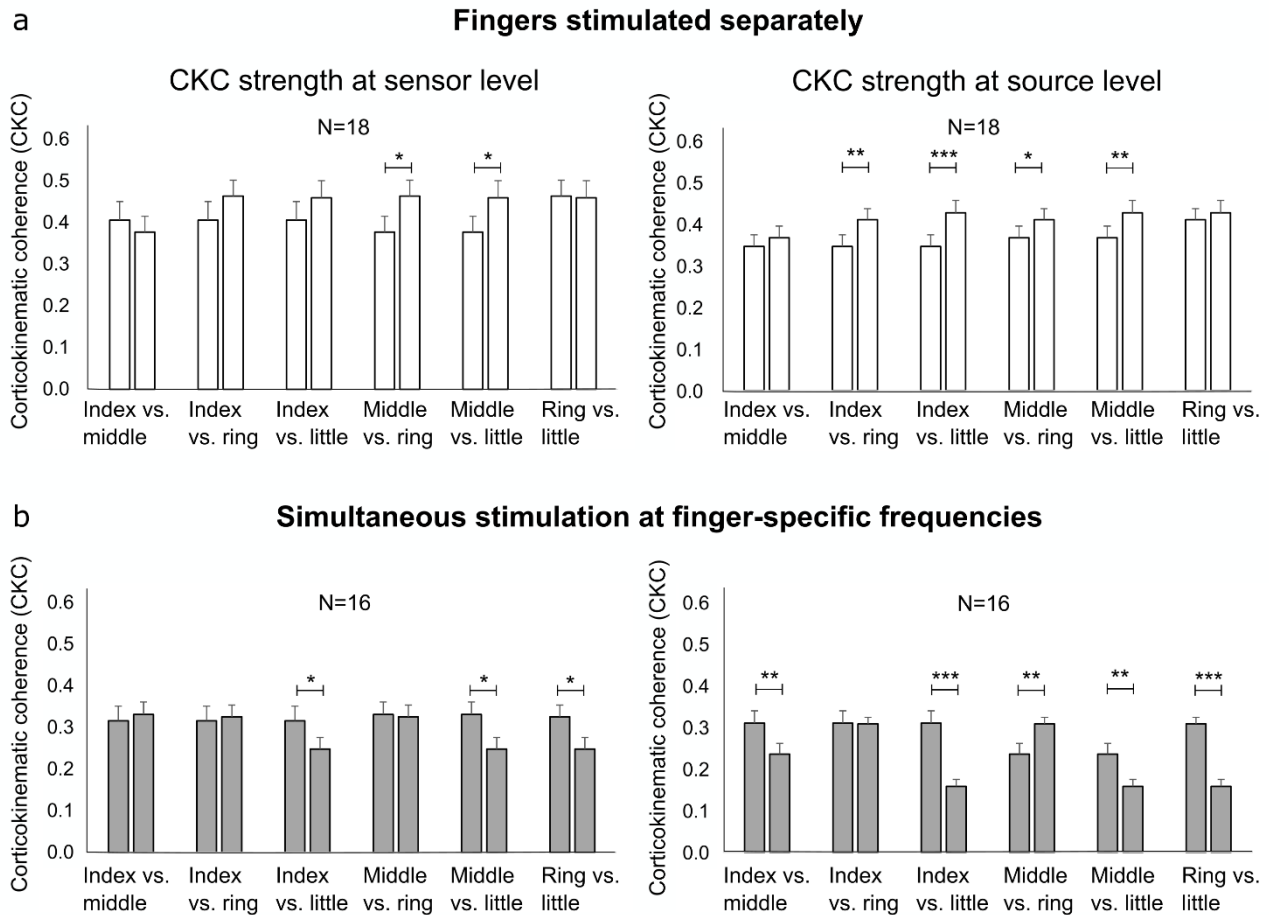

140

141 **Figure 3.** CKC strength for individual fingers. Average CKC for (a) the separate stimulation of individual  
 142 fingers and (b) for the simultaneous stimulation at the fingers at their specific frequencies. \*  $p < 0.05$ , \*\*  $p <$   
 143  $0.01$ , \*\*\*  $p < 0.001$ .

144 **CKC source locations were concentrated on hand region of the SM1 cortex (H4)**

145 An average between-finger distance was  $8.0 \pm 2.8$  mm ( $N = 16$ ) across the finger source locations  
 146 obtained by separate stimulation and simultaneous stimulation at finger specific frequencies. Sixteen  
 147 participants were included in all comparisons between source locations. In contrast to our fourth  
 148 hypothesis, the source locations of the fingers were partly distinct, but did not follow the consistent  
 149 somatotopic pattern (**Fig. 4, Table 3**) indicated by Penfield's homunculus (Penfield and Boldery,  
 150 1937; Penfield and Rasmussen, 1950) and subsequent studies (Hari et al., 1993; Nakamura et al.,  
 151 1998). The somatosensory representation of the index finger has shown to be the most dorsal and

152 inferior one along the central sulcus followed by the representations of the middle and ring fingers  
153 and, finally, the most ventral and superior representation of the little finger. Nevertheless, there were  
154 significant differences between the proprioceptive representations of the fingers. The CKC peak  
155 location was more medial for the ring (3.4 mm,  $p < 0.03$ ) and little (4.2 mm,  $p < 0.01$ ) fingers than  
156 for the index finger ( $x = -47.6 \pm 1.1$  mm) when the fingers were stimulated separately. Additionally,  
157 the ring finger was 3.9 mm more superior than the index finger ( $z = 54.5 \pm 1.7$  mm,  $p < 0.04$ ).  
158 According to a visual inspection of the participants' CKC source locations, the index and little fingers  
159 roughly followed the somatotopic arrangement in 6 out of 16 participants, the index finger being  
160 represented more dorsal and inferior to the little finger.

161 When stimulated simultaneously at the finger-specific frequencies, the CKC peak located 2.7 mm  
162 more medial for the ring finger than for the little finger ( $x = -48.5 \pm 1.4$  mm,  $p < 0.004$ ). The CKC  
163 for the ring finger peaked 4.2 mm ( $p < 0.001$ ) and for the little finger 3.5 mm ( $p < 0.001$ ) more  
164 posterior than for the index finger ( $y = -19.6 \pm 2.1$  mm). Additionally, the CKC for the ring finger  
165 peaked 13.3 mm ( $p < 0.001$ ) and for the little finger 12.6 mm ( $p < 0.001$ ) more posterior than for the  
166 middle finger ( $y = -10.5 \pm 1.8$  mm). The CKC peak located 4.6 mm ( $p < 0.001$ ) more superior for the  
167 ring finger and 2.2 mm ( $p < 0.05$ ) more superior for the little finger than for the index finger ( $z = 52.7$   
168  $\pm 1.5$  mm). Moreover, the CKC peaked 3.6 mm more superior for the ring finger than for the middle  
169 finger ( $z = 53.7 \pm 1.3$  mm  $p < 0.001$ ) and 2.4 mm more superior for the ring finger than for the little  
170 finger ( $z = 54.9 \pm 2.0$  mm,  $p < 0.006$ ). No statistically significant differences were found between the  
171 CKC peak locations of any of the finger when stimulated separately *versus* simultaneously at the  
172 finger-specific frequencies (**Fig. 4c**).

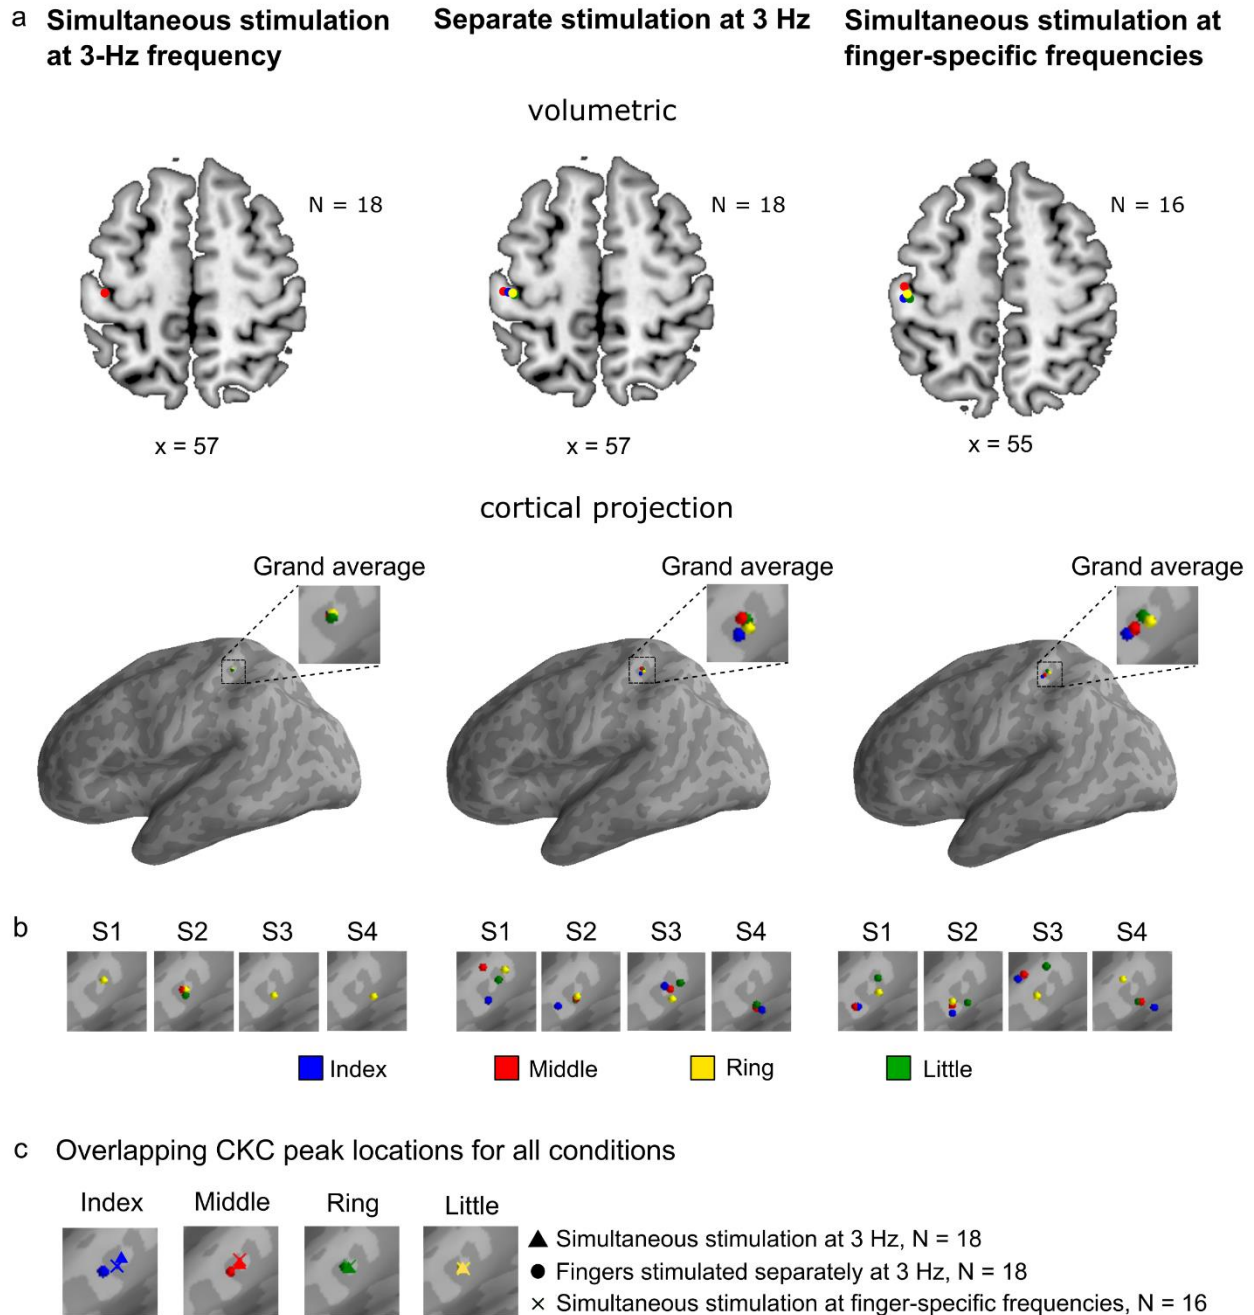

173

174 **Figure 4.** CKC-source-peak locations. (a) Group-level CKC source locations of each finger overlaid on the  
 175 same volumetric brain (upper row) and cortical surface (lower row) separately for each condition. Please, note  
 176 that x-coordinates are averages over the x-directional MNI coordinates of the CKC source locations of the four  
 177 fingers (for the MNI source coordinates of each finger, see **Table 3**). (b) CKC source locations of each finger  
 178 of four representative participants (S1–S4) overlaid on the same cortical surface separately for each condition.  
 179 In S1 and S2 participant, the source locations of the index and little fingers roughly followed the somatotopic

180 arrangement with respect to each other. The index finger was represented more dorsal and inferior to the little  
 181 finger. (c) Group-level CKC source locations of each condition overlaid on the same cortical surface separately  
 182 for each finger. Please, note that the source locations were concentrated on the Rolandic hand region of the  
 183 SM1 cortex (*i.e.* central sulcus) in the source volume, but were misleadingly projected away from the central  
 184 sulcus in the anterior wall of the postcentral sulcus when visualized to the cortical surface.

185 **Table 3:** The grand average MNI coordinates of CKC peak source locations.

| Finger | simultaneous <sub>constant-f</sub> , (N=18) |           |          | separate, (N=18) |           |          | simultaneous <sub>varied-f</sub> , (N=16) |           |          |
|--------|---------------------------------------------|-----------|----------|------------------|-----------|----------|-------------------------------------------|-----------|----------|
|        | X(mm)                                       | Y(mm)     | Z(mm)    | X(mm)            | Y(mm)     | Z(mm)    | X(mm)                                     | Y(mm)     | Z(mm)    |
| Index  | -44.0±1.0                                   | -24.1±1.7 | 57.3±1.3 | -47.6±1.1        | -23.5±1.8 | 54.5±0.4 | -47.7±1.6                                 | -19.7±2.0 | 52.7±1.5 |
| Middle | -44.0±1.0                                   | -24.1±1.7 | 57.2±1.3 | -45.7±1.2        | -24.3±1.4 | 58.4±0.3 | -47.3±1.6                                 | -20.5±2.0 | 53.7±1.3 |
| Ring   | -44.0±1.0                                   | -24.2±1.6 | 57.1±1.3 | -44.2±0.9        | -25.3±1.5 | 58.4±0.4 | -45.8±1.3                                 | -23.8±1.6 | 57.3±1.8 |
| Little | -44.0±1.0                                   | -24.2±1.6 | 57.3±1.3 | -43.4±1.2        | -25.9±1.5 | 56.6±0.4 | -48.5±1.4                                 | -23.1±2.0 | 54.9±2.0 |

186

## 187 Discussion

188 We examined the CKC strength and cortical source location to proprioceptive stimulation of the right-  
 189 hand fingers. Our results indicated that the *strongest* CKC was obtained with the most comprehensive  
 190 stimulation of all four right-hand fingers *at the same 3-Hz frequency*. This approach resulted in about  
 191 64% stronger CKC than stimulation the fingers separately. CKC was weakest for the simultaneous  
 192 stimulation of the fingers at finger-specific frequencies (2–3.5 Hz), being about 30% weaker than the  
 193 CKC obtained with stimulation of the fingers separately and about 57% weaker than the strongest  
 194 CKC. The CKC strength seems to be affected by both the finger dexterity and functional dominance.  
 195 The CKC was weaker for dexterous fingers during separate stimulation in agreement with the neural  
 196 efficiency hypothesis, but the opposite was true during simultaneous stimulation at finger-specific  
 197 frequencies supporting the hypothesis of the functional dominance of the dexterous fingers in  
 198 complex multidigit movements. All CKC source locations were concentrated (within ~8 mm) in the  
 199 Rolandic hand region of the SM1 cortex with some differences but without a consistent somatotopic  
 200 order between the fingers. The simultaneous stimulation of all or several fingers can be suggested to  
 201 improve robustness (signal-to-noise ratio) and time-efficiency of functional localization of the SM1

202 cortex of the hand when using the CKC method in combination with MEG. Finally, it remains open  
203 whether, in humans, the anatomical fractionation of the proprioceptive representations between the  
204 fingers of the same hand are less distinct and/or different compared to better studied tactile  
205 representations (Nakamura et al., 1998).

### 206 **Stronger CKC to simultaneous than separate-finger stimulation at 3 Hz**

207 In agreement with our hypothesis, the sensor-level CKC was ~64% stronger for the 3-Hz  
208 simultaneous stimulation of the fingers (index, middle, ring and little) than for the 3-Hz stimulation  
209 of the fingers separately. The result was replicated in the source-level analysis which showed ~28%  
210 stronger CKC for the simultaneous stimulation. Our result extends previous studies that have  
211 stimulated the proprioceptors related to the index finger (Bourguignon et al., 2016; Piitulainen et al.,  
212 2015, 2018b, 2020). We showed that the coherent proprioceptive afference from all induced fingers  
213 sum up to the SM1 cortex proprioceptive processing. Thus, the more comprehensive is the  
214 proprioceptive afference, the stronger is the cortical response or related proprioceptive processing.  
215 The stronger CKC may therefore reflect multidigit converging of the proprioceptive input. Similarly,  
216 the efferent motor output from the motor cortex converge and diverge when activating the hand  
217 muscles (McKiernan et al., 1998; Uematsu et al., 1992). Moreover, the fingers of the hand are  
218 functionally and anatomically overlapping. For example, activations of different neuromuscular  
219 regions in the monkey flexor digitorum profundus muscle, have shown to produce uniquely  
220 distributed tension in all five digits (Schieber et al., 2001). Thus, the neural control of the hand is  
221 likely more optimized for synergistic movements by combinations of fingers rather than control of  
222 individual fingers. Therefore, it is likely that the cortical proprioceptive processing is better optimized  
223 for the collective hand than individual digit movements. This hypothesis is further supported by a  
224 fMRI study which revealed that hand postural information, encoded through kinematic synergies of  
225 the fingers, strongly correlated with BOLD activation patterns in the SM1 cortex (Leo et al., 2016).  
226 An additional reason for the stronger CKC for the simultaneous finger stimulation could be the

227 insufficient specificity of MEG to perfectly register the individual finger responses. MEG is biased  
228 towards neuronal activity from tangential currents, thus recording activity predominantly from sulci  
229 (*i.e.* fissural cortex) rather than gyri (Hillebrand and Barnes, 2002).

230 **Weaker CKC to simultaneous stimulation at finger-specific frequencies than separate**  
231 **stimulation**

232 In contrast to our hypothesis, the stimulation of the fingers simultaneously at the finger-specific  
233 frequencies did not elicit analogous CKC values to their separate stimulation, but all fingers showed  
234 30–36% weaker CKC when compared to the separate stimulation. Given that CKC has shown to be  
235 unaffected by the movement frequency of the finger (Marty et al., 2015; Piitulainen et al., 2015), it  
236 seems that proprioceptive afference from the other simultaneously stimulated fingers distracts the  
237 finger acceleration phase-locking to MEG signals reducing the CKC strength. As the fingers were  
238 stimulated with different frequencies, it is likely that the respective cortical responses are temporally  
239 overlapping in random manner, which likely hinders the respective signal-to-noise ratios and  
240 prominence of the MEG response (*i.e.*, the coherent event), and eventually the CKC strength.

241 The greatest reduction in CKC from separate to simultaneous stimulation was observed for the little  
242 (~48–62% weaker CKC) and ring (~24–31%) fingers. This observation may be due to their lower  
243 level of dexterity and thus extent of the neuronal circuit responsible for the cortical proprioceptive  
244 processing for these fingers. It is plausible that during the simultaneous stimulation the MEG signal  
245 is more dominated by the more dexterous fingers, as the index and middle fingers, which may have  
246 larger cortical neuronal population involved in their proprioceptive processing. It is possible that  
247 cortical neural circuits of the more dexterous fingers partly overlap and dominate the circuits of the  
248 less dexterous (“assisting”) fingers. When a dominant finger is moved, proprioceptive afference  
249 (primarily from muscle afferents) would spread widely to the neural circuits of the other fingers,  
250 distracting the phase locking of their MEG responses. Ejaz et al. (2015) investigated fMRI data  
251 measured during active finger tapping tasks and showed that, indeed, BOLD representations of all



252 fingers overlapped in the hand SM1 cortex, and the overlap was especially large between the middle  
253 and ring fingers. Furthermore, the between-finger similarity in BOLD response patterns correlated  
254 with the co-occurrence of common everyday-hand kinematics. This result suggested that the neural  
255 synergies are stronger between the fingers that frequently move together.

256 Another aspect is that the proprioceptive afference and its cortical processing may partly overlap in  
257 the functionally closely related fingers of the same hand. The functional interconnections between  
258 fingers have been estimated by measuring finger kinematics and kinetics when the subject has been  
259 instructed to produce isolated one finger contraction (Reilly and Hammond, 2000) or repetitive  
260 tapping (Aoki et al., 2003; Häger-Ross and Schieber, 2000). Strong “involuntary” forces or large  
261 movements by the noninstructed fingers were interpreted to reflect strong structural (*i.e.* tendons and  
262 muscles) and/or neuronal connection between the fingers. According to these studies, the index finger  
263 was the most independent and the ring finger the least independent of the other fingers. The middle  
264 finger was reported to be more independent than the little finger (Aoki et al., 2003; Reilly and  
265 Hammond, 2000) or vice versa (Häger-Ross and Schieber, 2000). Similar results have been obtained  
266 when the independence of the finger has been estimated based on the degree of how well the kinetics  
267 of the other fingers predict the finger kinematics in everyday-hand movements (Ingram et al., 2008).  
268 These results agree with our finding that the CKC strength of the most independent index finger was  
269 least affected by the simultaneous movement of the other fingers. Finally, based on our results, it  
270 appears that the level of independence and functional overlap in the fingers kinematics and functions  
271 are evident also in the cortical level of proprioceptive processing.

## 272 **CKC strength reflects finger dexterity and functional dominance**

273 The dexterity (Kinoshita et al., 1996; Swanson et al., 1974; Zatsiorsky et al., 1998) and independence  
274 (Aoki et al., 2003; Häger-Ross and Schieber, 2000; Ingram et al., 2008; Reilly and Hammond, 2000)  
275 varies between the fingers based on the kinetics of voluntary finger actions. For this reason, we  
276 expected that the most dexterous index finger, with presumably the greatest degree of proprioceptive

277 afference to the SM1 cortex, would show the strongest CKC, and the opposite would be true for the  
278 less dexterous fingers. Interestingly, we observed stronger CKC for the little and ring fingers (by  
279 ~14–26%) than the middle and index fingers. This suggests that the stronger CKC may reflect weaker  
280 motor performance (*i.e.* dexterity) and/or level of usage of the ring and little fingers. The index and  
281 middle fingers are more utilized *e.g.* for grasping than the ring and little fingers (Kamakura et al.,  
282 1980). In addition, stronger CKC has shown to reflect worse standing balance performance in older  
283 (66–73 years) and younger (18–31 years) adults (Piitulainen et al., 2018b). Moreover, BOLD  
284 responses are stronger for the little than index finger tapping, presumably reflecting more challenging  
285 and/or less efficient cortical motor control of the less dexterous little finger (Erdler et al., 2001).  
286 Similarly, movement-related cortical potentials in the SM1 cortex have shown to be stronger for  
287 novices than motor-skilled subjects (Kita et al., 2001; Wright et al., 2012). Together, these results  
288 support the neural efficiency hypothesis, where a smaller neuronal population is recruited with  
289 improved motor efficiency and precision (Haier et al., 1988).

290 An opposite association was obtained when the fingers were stimulated at the finger-specific  
291 frequencies simultaneously. CKC was ~43–77% stronger for the index, middle and ring fingers than  
292 for the little finger. In addition, the index and ring fingers yielded 35% stronger CKC than the middle  
293 finger. These results further demonstrate that the phase-locking of the MEG response and individual  
294 finger kinematics is affected by the other fingers at a finger-specific manner. It could be hypothesized  
295 that the more dexterous fingers dominate or “lead” the cortical proprioceptive processing during  
296 complex movement sequences of the hand. It is noteworthy that more statistically significant  
297 between-finger differences were detected at the source than sensor level analysis of the same data.  
298 This may reflect that the source analysis yields higher signal-to-noise ratio than the sensor analysis  
299 due to spatial filtering suppressing the irrelevant background activity. In addition, in the source space  
300 the contribution of all MEG sensors is taken into account when estimating CKC, whereas in sensor

301 space only the one peak gradiometer pair contributes to the results. However, both approaches are  
302 acceptable as the main results were well replicated.

### 303 **CKC source locations were concentrated on the hand region of the SM1 cortex**

304 Our fourth hypothesis was that the cortical source location would not significantly vary between the  
305 fingers in our participants, and thus each finger representation would similarly represent the Rolandic  
306 hand region in the SM1 cortex. In agreement with our hypothesis, the source locations of the fingers  
307 were only partly distinct and did not follow the consistent somatotopic pattern indicated by Penfield's  
308 homunculus (Penfield and Boldery, 1937; Penfield and Rasmussen, 1950). However, there is no prior  
309 MEG evidence about proprioceptive representations of the same hand in the human SM1 cortex,  
310 although there is some evidence about somatotopic finger organization in cutaneous tactile domain  
311 (Nakamura et al., 1998).

312 As expected, the peak CKC locations were concentrated on the Rolandic SM1 cortex (within ~8 mm)  
313 replicating previous results obtained by proprioceptive stimulation of the index finger (Bourguignon  
314 et al., 2016; Piitulainen et al., 2020, 2018b, 2015). However, the exact spatial coordinates for CKC  
315 source have been reported previously only for passive index finger movements elicited by an  
316 experimenter (Piitulainen et al., 2013b), not by precise stimulator. The distance between their and the  
317 current mean CKC source locations was ~10 mm.

318 MEG is biased towards neuronal activity in the sulci (i.e., fissural cortex) and is less sensitive to deep  
319 and radial currents (Hamalainen et al., 1993; Hillebrand and Barnes, 2002). It is possible that due to  
320 these methodological limitations of MEG, we were unable to define the consistent proprioceptive  
321 finger representations in the SM1 cortex. Alternatively, the result may reflect that true neuroanatomy  
322 is less fractionated in the proprioceptive domain and could thus vary more between individuals when  
323 compared to, *e.g.*, tactile domain. This is a challenge when distinguishing the group-level finger  
324 representations. A recent fMRI study revealed that finger-specific BOLD activation patterns elicited

325 by finger tapping in the SM1 cortex are not somatotopically organized, and that their spatial layout is  
326 variable across subjects, while the relative similarity between any pair of activity patterns (*i.e.*,  
327 Mahalanobis distances between digit-specific activation patterns) is invariant across subjects (Ejaz et  
328 al., 2015).

329 Our results are in line with tactile MEG and EEG studies that have reported either overlapping  
330 locations of somatosensory evoked field potentials of fingers (Baumgartner et al., 1993; Kalogianni  
331 et al., 2018; Schaefer et al., 2002; Simões et al., 2001) or that have managed to discriminate the  
332 activations related to mainly the index finger and thumb (Barbati et al., 2006; Nierula et al., 2013;  
333 Rossini et al., 2001, 1998). However, some MEG studies have found somatotopic cortical  
334 organization to tactile stimulation of the fingers (Nakamura et al., 1998). Similarly, fMRI studies  
335 have found somatotopic but partly overlapping cortical organization in S1 cortex to tactile stimuli of  
336 the fingers (Besle et al., 2013; Martuzzi et al., 2014).

### 337 **Further perspectives and limitations**

338 Our results have practical implications for the functional mapping of the hand area in the SM1 cortex  
339 using CKC. The strongest CKC was obtained for the simultaneous 3-Hz stimulation of the fingers.  
340 Therefore, we suggest the *simultaneous* stimulation of several fingers at the *same* frequency to further  
341 improve robustness and time-efficiency of CKC method for functional mapping of the hand region  
342 in the SM1 cortex. However, this is not crucial issue as strong and robust CKC is detected for one-  
343 finger stimulation as well (Piitulainen et al., 2015), even in presence of strong magnetic artefacts  
344 (Bourguignon et al., 2016).

345 If the CKC strength of the individual fingers is of interest, each of the fingers should be stimulated  
346 separately rather than simultaneously at the finger-specific frequencies. This is because the  
347 simultaneous stimulation at the finger-specific frequencies resulted in the weaker CKC and, therefore,  
348 the signal-to-noise ratio likely decreases compared to the stimulation of the fingers separately.

349 Moreover, since the reduction in the CKC strength was finger-specific, the simultaneous stimulation  
350 with finger-specific frequencies can be less reliable approach to investigate the relative extent of the  
351 fingers proprioceptive processing in the SM1 cortex.

352 The proprioceptive stimulation of the fingers were generated with our neuroimaging compatible four-  
353 finger movement actuator which is an extension of the previous one-finger movement actuator  
354 (Piitulainen et al., 2015). The actuator had a millisecond timing accuracy and stabile stimuli and did  
355 not produce any artifacts to MEG signals. Thus, it provides a robust and reliable neuroimaging  
356 compatible tool to locate and investigate multi-finger proprioceptive afference to the SM1 cortex.  
357 The stimulator is suitable to study mechanisms of various motor disorders, since it allows meaningful  
358 reproducible comparisons between controls and patients who might have impaired ability to perform  
359 active motor tasks. However, it should be noted that the proprioceptive processing in the SM1 cortex  
360 may differ between passive and active movements and therefore, the four-finger actuator can only be  
361 used to investigate the processing of passive component of proprioception. Passive movements  
362 together with motor imaginary would correspond more closely the active movements, and may also  
363 be beneficial in the rehabilitation of the neurological patients. Indeed, imagined movements have  
364 shown to engage the same sensorimotor mechanisms as active movements do (Kilteni et al., 2018;  
365 Miller et al., 2010; Szameitat et al., 2006). Finally, the passive movement actuator does not activate  
366 solely the proprioceptors but inevitably also the functionally closely related tactile mechanoreceptors  
367 of the skin. These mechanoreceptors, responding, *e.g.*, to stretch of the skin, can therefore be  
368 considered as a part of the same system providing the brain relevant information about the peripheral  
369 movement and actions. In addition, the CKC strength has shown to be unaffected by the level of  
370 tactile stimulation of the fingertip during active and passive index-finger movements (Piitulainen et  
371 al., 2013b), and therefore, CKC primarily reflects cortical processing of proprioceptive afference.

372

373

## 374 **Conclusion**

375 The most comprehensive *simultaneous* stimulation of the right-hand fingers at the *same* frequency  
376 elicited the *strongest* CKC and can, therefore, be recommended as a robust and fast method for  
377 functional localization of the human hand region in the SM1 cortex using MEG. The modulation of  
378 the CKC strength in an individual finger by the other simultaneously stimulated fingers suggest that  
379 the respective proprioceptive afference is being processed in partly overlapping cortical neuronal  
380 circuits or populations. Individual fingers CKC strength was stronger in less dexterous or independent  
381 fingers in accordance with the neural efficiency hypothesis, but opposite observation was true when  
382 the fingers were stimulated simultaneously, which underlines the dominance of the more dexterous  
383 fingers in the cortical proprioceptive processing. The CKC sources of the fingers were concentrated  
384 in the Rolandic hand region of the SM1 cortex without systematic somatotopic organization, and thus,  
385 their representations appear partly overlapping, and/or MEG method is not sufficient to separate  
386 proprioceptive finger representations of the same hand adequately.

## 387 **Materials and methods**

### 388 **Participants**

389 Twenty-one healthy participants (mean age: 27.8, SD: 4.9, range: 20–40, 10 females, mean  
390 handedness score: 77.1; SD: 41.3 range: –80–100, one left-handed, one ambidextrous) without  
391 neuropsychiatric diseases, movement disorders or non-removable metallic objects in their body  
392 volunteered in the study. The data of three participants were excluded from the comparisons of CKC  
393 strength or source locations between *simultaneous*<sub>constant-f</sub> and *separated* conditions and five between  
394 *simultaneous*<sub>varied-f</sub> and *separated* conditions because of bad signal quality. Thus, the total numbers  
395 of participants included to the final analyses were 18 (mean age: 27.5, SD: 5.2, range: 20–40, 8  
396 females, mean handedness score: 75.2; SD: 44.1 range: –80–100, one left-handed, one ambidextrous)  
397 and 16 (mean age: 27.2, SD: 5.4, range: 20–40, 7 females, mean handedness score: 73.6; SD: 46.6  
398 range: –80–100, one left-handed, one ambidextrous), respectively. The handedness scores were

399 assessed by a modified Edinburgh Handedness Inventory (Oldfield, 1971). The study was approved  
400 by the ethics committee of Aalto University, and the participants gave written informed consent  
401 before participation.

## 402 **Experimental design**

403 At the beginning of the MEG session, the participant was briefed about the experiment. Before  
404 entering the MEG, the participant was provided with non-magnetic clothes and asked to remove  
405 any metallic objects he/she was wearing. During the MEG measurement, the participant was sitting  
406 with stimulated right hand on the custom-made proprioceptive stimulator (*i.e.* MEG-compatible  
407 movement actuator) placed on the table. The stimulator was an extension of our previously developed  
408 one-finger stimulator (Piitulainen et al., 2015). The tip of each of the four fingers was taped at the  
409 end of the finger-specific pneumatic muscle of the stimulator. Additionally, a piece of surgical tape  
410 (Leukoplast) was lightly attached on the palmar surface of each fingertip to minimize tactile  
411 stimulation elicited by the tactile contact between the fingertips and the stimulator. Accelerations of  
412 the fingers were measured with 3-axis accelerometers (ADXL335 iMEMS Accelerometer, Analog  
413 Devices Inc., Norwood, MA, USA) firmly taped on the nail of each finger. The left hand was resting  
414 on the thigh. The participant wore earplugs and Brownian noise was played in the background via a  
415 flat-panel speaker (Panphonics 60 × 60 SSHP, Tampere, Finland) to minimize auditory noise  
416 resulting from the airflow within the pneumatic muscles. To prevent the participant from seeing the  
417 moving fingers, a white A3-sized paper sheet was taped vertically to the MEG gantry. The participant  
418 was presented with a video of different landscapes (for two participants the video was not presented  
419 because of technical problems). Proprioceptive stimuli were controlled using Presentation software  
420 (ver. 18.1, Neurobehavioral Systems, Albany, CA, United States).

421 There were three conditions: (1) simultaneous stimulation of all four fingers at 3 Hz (*i.e.* stimulus  
422 onset asynchrony of 333 ms) in three 1-min bursts (*simultaneous*<sub>constant-*f*</sub>, 3 min stimulation in total),  
423 (2) stimulation of each finger separately at 3 Hz in three 1-min bursts (*separate*, 3 min stimulation

424 per finger in total) and (3) simultaneous stimulation at finger-specific frequencies (at 2, 2.5, 3 and 3.5  
425 Hz, *simultaneous*<sub>varied-f</sub>) for 4 min. The data for *simultaneous*<sub>constant-f</sub> and *separate* was collected in  
426 the same measurement, and the presentation order of the stimulation bursts was randomized for each  
427 participant. The duration of this measurement was 15 min.

## 428 **Data acquisition**

429 MEG recordings were performed in a three-layer  $\mu$ -metal magnetically shielded room (Imedco AG,  
430 Hägendorf, Switzerland) at MEG core of Aalto Neuroimaging Infrastructure (ANI) using a whole-  
431 scalp MEG device (Vectorview 4-D Neuromag Oy, Finland), with 204 gradiometer and 102  
432 magnetometer sensors. MEG signals were band-pass filtered at 0.1–330 Hz and sampled at 1 kHz.  
433 Eye blinks were detected from electro-oculography (EOG) signal using an electrode pair placed above  
434 and below the left eye. Five head-position indicator (HPI) coils were used to determine the position  
435 of the head with respect to the MEG sensors, and to record head position continuously during the  
436 MEG recording. Prior the MEG measurements, the locations of the HPI coils were recorded with  
437 respect to three anatomical landmarks (nasion and two preauricular points) using a 3-D digitizer  
438 (Isotrack, Polhemus, Colchester, VT, USA). Additionally, points on the scalp surface (~100) were  
439 digitized to facilitate co-registration between MEG data and anatomical magnetic resonance images.  
440 The participants were measured in seated position and instructed to avoid blinking and remain  
441 stationary during the measurement. The acceleration signals measured by the accelerometers attached  
442 on the nail of each finger were low-pass filtered at 330 Hz and sampled at 1 kHz time-locked to MEG  
443 signals.

444 Anatomical magnetic resonance imaging (MRI) images were acquired using a 3-tesla MRI scanner  
445 (MAGNETOM Skyra, Siemens Healthcare, Erlangen, Germany) and a 32-channel receiving head  
446 coil at the Advanced Magnetic Imaging (AMI) centre of Aalto University. MRI data was measured  
447 with a high-resolution T1-weighted Magnetization Prepared Rapid Gradient Echo (MPRAGE) pulse



448 sequence (repetition time (TR) = 2530 ms, echo time (TE) = 3.3 ms, flip angle = 7, 256 x 256 matrix,  
449 176 sagittal slices, 1-mm resolution).

#### 450 **MEG preprocessing**

451 MEG data was first visually inspected to identify noisy channels. Next, the uncorrelated sensor noise  
452 was reduced using the oversampled temporal projection (OTP, Larson and Taulu, 2018) algorithm.  
453 The temporally extended signal space separation algorithm (tSSS, MaxFilter 2.2 software, Elekta  
454 Neuromag Oy, Helsinki, Finland (Taulu and Simola, 2006), buffer length: 16 sec, correlation limit:  
455 0.95) was applied to the MEG data to reduce environmental magnetic noise and interpolate the noisy  
456 channels. Visually identified noisy channels were given as an argument to the OTP and tSSS  
457 algorithms, and an automatic noisy channel detection (autobad option) was used in tSSS to further  
458 identify any noisy channels. To remove eye blinks and heart beats from the MEG signals, the data  
459 was decomposed into 30 independent components using fast independent component analysis  
460 (FastICA, Hyvärinen and Oja, 2000). Independent components related to the blinks and heart beats  
461 were identified by visually inspecting the topographies and time-series of ICA components and,  
462 thereafter, subtracted from the data. The ICA components were determined from the data filtered  
463 between 1–40 Hz using a zero-phase finite impulse response filter (firwin in SciPy 1.2.1; Hamming  
464 window, Virtanen et al., 2020) and removed from the nonfiltered data. OTP and ICA were performed  
465 using MNE Python software (version 3.6, Gramfort et al., 2014, 2013). The acceleration data of four  
466 accepted participants was missing and, therefore, replaced with the accelerometer data from another  
467 participant (stimulus sequence was identical across participants).

#### 468 **Sensor level CKC analysis**

469 To compute CKC between MEG and accelerometer signals for each finger, continuous data were split  
470 into epochs of 2000 ms with an overlap of 5 ms (Bortel and Sovka, 2007; Bourguignon et al., 2011).  
471 The epochs exceeding 2000 fT/cm at gradiometers and 4000 fT at magnetometers in peak-to-peak  
472 amplitude were excluded automatically from the data. Acceleration corresponding to each epoch was

473 computed as Euclidean norm of the tree orthogonal accelerometer signals band-passed between 0.5–  
474 195 Hz. The acceleration epochs were normalized by their Euclidean norms (Bourguignon et al.,  
475 2011). Thereafter, CKC was computed between MEG and accelerometer signals resulting in cross-,  
476 power, and coherence spectra and cross-correlogram (Halliday et al., 1995). Peak CKC strength was  
477 determined as the maximum coherence at the stimulation frequency over all MEG channels for each  
478 participant. The topographic distributions of CKC were visualized using Fieldtrip software  
479 (Oostenveld et al., 2011). The threshold for statistical significance corrected for multiple comparisons  
480 was computed as follows separately for all fingers and conditions for each participant with the  
481 following equation

$$482 \quad coh_{thr} = 1 - \left( \frac{0.05/N_{sens}}{N_f} \right)^{\frac{1}{(N_{trials}/d-1)}}$$

483 where  $N_{sens}$  is the number of MEG sensors among which the maximum coherence was searched,  $N_f$   
484 is the number of the frequencies of interest (*i.e.* one since we studies only the movement  
485 frequency),  $N_{trials}$  number of trials and  $d$  the overlap between trials (*i.e.* 5 ms, Bortel and Sovka,  
486 2007).

### 487 **Source level CKC analysis**

488 The dynamic imaging of coherent sources (DICS) beamformer (Bourguignon et al., 2013a, 2011;  
489 Gross et al., 2001) was used to estimate CKC between MEG signals and Euclidian norm of the  
490 accelerometer signals in the source space. To this end, cortical surfaces were reconstructed from T1  
491 images using FreeSurfer's recon-all algorithm (Freesurfer software v. 6.0, Dale et al., 1999; Fischl et  
492 al., 1999). To compute the forward model, a single-compartment boundary-element model (BEM) of  
493 the inner skull was generated using the FreeSurfer's watershed algorithm. Each participant's MEG  
494 sensor positions and MRI data were co-registered by aligning fiducial points in MEG and MRI (*i.e.*  
495 nasion, left and right preauricular points) as well as aligning MEG head digitization with the scalp.  
496 The fiducial points were manually identified on the MRI, and the fiducial registration error between

497 MEG and MRI points was minimized by translating and rotating the MEG-digitized fiducials first  
498 automatically, and thereafter, adjusting the alignment manually. The forward model was computed  
499 for the volume source space with 6.2-mm spacing between the grid points (ico4 resolution). The  
500 leadfield with three components was reduced to the leadfield with two components corresponding to  
501 the highest singular values. The noise covariance matrix was estimated from the same file for which  
502 the source space CKC was computed. Finally, CKC maps were generated at the stimulation  
503 frequencies by computing CKC for all sources using DICS approach.

#### 504 **Statistical analyses**

505 First, we investigated whether the strength of CKC differs between the simultaneous 3-Hz stimulation  
506 and separate 3-Hz stimulation (H1). To this end, a two-way 2 x 4 repeated measurements analysis of  
507 variances (rANOVA) was carried out, with the within-participant factors of condition  
508 (*simultaneously<sub>constant</sub>* vs. *separately*) and finger (index, middle, ring, little). Second, a similar  
509 rANOVA design was used to study whether CKC strength differs between the simultaneous  
510 stimulation at the finger-specific frequencies and separate 3-Hz stimulation (H2). For each finger, the  
511 number of accepted trials in separate stimulation was set as an upper limit of the trials in simultaneous  
512 stimulation at the finger-specific frequencies since the MEG measurement under separate stimulation  
513 was 1 minute shorter. We performed all rANOVAs separately for sensor and source level CKC  
514 strengths. Third, we used Newman-Keuls post hoc test to determine whether there were differences  
515 between fingers (H3). Fourth, we studied whether the source location of CKC differs between fingers  
516 in separate stimulation and simultaneous stimulation at the finger-specific frequencies by using  
517 Newman-Keuls post hoc comparisons separately for x-, y- and z- source coordinates in MNI space  
518 (H4). For all rANOVAs, Kolmogorov-Smirnov test and Mauchly test were run to test the normality  
519 and sphericity of the data, respectively. rANOVAs, Kolmogorov-Smirnov tests and Mauchly tests  
520 were implemented with Statistica 7.1 (StatSoft. Inc. 1984-2005). To test the consistency of the CKC  
521 location, we used the two-sample T-test (MATLAB R2019b) to compare the MNI coordinates of the

522 CKC peaks elicited by *simultaneous*<sub>constant-f</sub> condition and 3-Hz stimulation of the index finger. The  
523 normality of the data was tested for T-tests using Kolmogorov-Smirnov test (MATLAB R2019b,  
524 Massey, 1951).

## 525 **Acknowledgements**

526 We thank Helge Kainulainen from his technical support in building the pneumatic system at Aalto  
527 NeuroImaging, Aalto University, Espoo, Finland. The reconstruction of cortical surfaces from T1  
528 images was performed using computer resources within the Aalto University School of Science  
529 “Science-IT” project.

## 530 **Funding**

531 This study has been supported by the Academy of Finland (grants #296240, #326988, #307250 and  
532 #327288) to HP and ”Brain changes across the life-span” profiling funding (#311877) to University  
533 of Jyväskylä), and Jane and Aatos Erkkö Foundation to HP.

## 534 **Author contributions**

535 Hakonen, M.: Conceptualization, Methodology, Software, Validation, Formal Analysis, Data  
536 Curation, Writing – Original Draft Preparation, Visualization; Nurmi, T.: Investigation, Resources,  
537 Writing – Review & Editing; Jaatela, J.: Methodology, Writing – Review & Editing; Vallinoja, J.:  
538 Methodology, Writing – Review & Editing; Piitulainen H.: Conceptualization, Methodology, Writing  
539 – Review & Editing, Supervision, Project Administration, Funding Acquisition

## 540 **References**

541 Aoki, T., Francis, P.R., Kinoshita, H., 2003. Differences in the abilities of individual fingers during  
542 the performance of fast, repetitive tapping movements. *Exp. Brain Res.* 152, 270–280.

543 <https://doi.org/10.1007/s00221-003-1552-z>

544 Barbati, G., Sigismondi, R., Zappasodi, F., Porcaro, C., Graziadio, S., Valente, G., Balsi, M.,

- 545        Rossini, P.M., Tecchio, F., 2006. Functional source separation from magnetoencephalographic  
546        signals. *Hum. Brain Mapp.* 27, 925–934. <https://doi.org/10.1002/hbm.20232>
- 547    Baumgartner, C., Doppelbauer, A., Sutherling, W.W., Lindinger, G., Levesque, M.F., Aull, S.,  
548        Zeitlhofer, J., Deecke, L., 1993. Somatotopy of human hand somatosensory cortex as studied  
549        in scalp EEG. *Electroencephalogr. Clin. Neurophysiol. Evoked Potentials* 88, 271–279.  
550        [https://doi.org/10.1016/0168-5597\(93\)90051-P](https://doi.org/10.1016/0168-5597(93)90051-P)
- 551    Besle, J., Sánchez-Panchuelo, R.M., Bowtell, R., Francis, S., Schluppeck, D., 2013. Single-subject  
552        fMRI mapping at 7 T of the representation of fingertips in S1: A comparison of event-related  
553        and phase-encoding designs. *J. Neurophysiol.* 109, 2293–2305.  
554        <https://doi.org/10.1152/jn.00499.2012>
- 555    Bortel, R., Sovka, P., 2007. Approximation of statistical distribution of magnitude squared  
556        coherence estimated with segment overlapping. *Signal Processing* 87, 1100–1117.  
557        <https://doi.org/10.1016/j.sigpro.2006.10.003>
- 558    Bourguignon, M., De Tiège, X., De Beeck, M.O., Ligot, N., Paquier, P., Van Bogaert, P., Goldman,  
559        S., Hari, R., Jousmäki, V., 2013a. The pace of prosodic phrasing couples the listener’s cortex  
560        to the reader’s voice. *Hum. Brain Mapp.* 34, 314–326. <https://doi.org/10.1002/hbm.21442>
- 561    Bourguignon, M., De Tiège, X., de Beeck, M.O., Pirotte, B., Van Bogaert, P., Goldman, S., Hari,  
562        R., Jousmäki, V., 2011. Functional motor-cortex mapping using corticokinematic coherence.  
563        *Neuroimage* 55, 1475–1479. <https://doi.org/10.1016/j.neuroimage.2011.01.031>
- 564    Bourguignon, M., Jousmäki, V., Marty, B., Wens, V., Op de Beeck, M., Van Bogaert, P., Nouali,  
565        M., Metens, T., Lubicz, B., Lefranc, F., Bruneau, M., De Witte, O., Goldman, S., De Tiège, X.,  
566        2013b. Comprehensive Functional Mapping Scheme for Non-Invasive Primary Sensorimotor  
567        Cortex Mapping. *Brain Topogr.* 26, 511–523. <https://doi.org/10.1007/s10548-012-0271-9>

- 568 Bourguignon, M., Piitulainen, H., De Tiège, X., Jousmäki, V., Hari, R., 2015. Corticokinematic  
569 coherence mainly reflects movement-induced proprioceptive feedback. *Neuroimage* 106, 382–  
570 390. <https://doi.org/10.1016/j.neuroimage.2014.11.026>
- 571 Bourguignon, M., Whitmarsh, S., Piitulainen, H., Hari, R., Jousmäki, V., Lundqvist, D., 2016.  
572 Reliable recording and analysis of MEG-based corticokinematic coherence in the presence of  
573 strong magnetic artifacts. *Clin. Neurophysiol.* 127, 1460–1469.  
574 <https://doi.org/10.1016/J.CLINPH.2015.07.030>
- 575 Dale, A.M., Fischl, B., Sereno, M.I., 1999. Cortical surface-based analysis: I. Segmentation and  
576 surface reconstruction. *Neuroimage* 9, 179–194. <https://doi.org/10.1006/nimg.1998.0395>
- 577 Ejaz, N., Hamada, M., Diedrichsen, J., 2015. Hand use predicts the structure of representations in  
578 sensorimotor cortex. *Nat. Neurosci.* 18, 1034–1040. <https://doi.org/10.1038/nn.4038>
- 579 Erdler, M., Windischberger, C., Lanzenberger, R., Edward, V., Gartus, A., Deecke, L., Beisteiner,  
580 R., 2001. Dissociation of supplementary motor area and primary motor cortex in human  
581 subjects when comparing index and little finger movements with functional magnetic  
582 resonance imaging. *Neurosci. Lett.* 313, 5–8. [https://doi.org/10.1016/S0304-3940\(01\)02167-X](https://doi.org/10.1016/S0304-3940(01)02167-X)
- 583 Fischl, B., Sereno, M.I., Tootell, R.B., Dale, A.M., 1999. High-resolution intersubject averaging  
584 and a coordinate system for the cortical surface. *Hum. Brain Mapp.* 8, 272–84.
- 585 Gramfort, A., Luessi, M., Larson, E., Engemann, D.A., Strohmeier, D., Brodbeck, C., Goj, R., Jas,  
586 M., Brooks, T., Parkkonen, L., Hämäläinen, M., 2013. MEG and EEG data analysis with  
587 MNE-Python. *Front. Neurosci.* 7, 267. <https://doi.org/10.3389/fnins.2013.00267>
- 588 Gramfort, A., Luessi, M., Larson, E., Engemann, D.A., Strohmeier, D., Brodbeck, C., Parkkonen,  
589 L., Hämäläinen, M.S., 2014. MNE software for processing MEG and EEG data. *Neuroimage*  
590 86, 446–460. <https://doi.org/10.1016/j.neuroimage.2013.10.027>

- 591 Gross, J., Kujala, J., Hämäläinen, M., Timmermann, L., Schnitzler, A., Salmelin, R., 2001.  
592 Dynamic imaging of coherent sources: Studying neural interactions in the human brain. *Proc.*  
593 *Natl. Acad. Sci. U. S. A.* 98, 694–699. <https://doi.org/10.1073/pnas.98.2.694>
- 594 Häger-Ross, C., Schieber, M.H., 2000. Quantifying the Independence of Human Finger  
595 Movements: Comparisons of Digits, Hands, and Movement Frequencies.
- 596 Haier, R.J., Siegel, B. V., Nuechterlein, K.H., Hazlett, E., Wu, J.C., Paek, J., Browning, H.L.,  
597 Buchsbaum, M.S., 1988. Cortical glucose metabolic rate correlates of abstract reasoning and  
598 attention studied with positron emission tomography. *Intelligence* 12, 199–217.  
599 [https://doi.org/10.1016/0160-2896\(88\)90016-5](https://doi.org/10.1016/0160-2896(88)90016-5)
- 600 Halliday, D.M., Rosenberg, J.R., Amjad, A.M., Breeze, P., Conway, B.A., Farmer, S.F., 1995. A  
601 framework for the analysis of mixed time series/point process data-Theory and application to  
602 the study of physiological tremor, single motor unit discharges and electromyograms. *Prog.*  
603 *Biophys. Mol. Biol.* [https://doi.org/10.1016/S0079-6107\(96\)00009-0](https://doi.org/10.1016/S0079-6107(96)00009-0)
- 604 Hamalainen, M., Hari, R., Ilmoniemi, R.J., Knuutila, J., Lounasmaa, O. V, 1993.  
605 Magnetoencephalography theory, instrumentation, and applications to noninvasive studies of  
606 the working human brain. <https://doi.org/10.1103/revmodphys.65.413>
- 607 Hari, R., Karhu, J., Hämäläinen, M., Knuutila, J., Salonen, O., Sams, M., Vilkmann, V., 1993.  
608 Functional Organization of the Human First and Second Somatosensory Cortices: a  
609 Neuromagnetic Study. *Eur. J. Neurosci.* 5, 724–734. [https://doi.org/10.1111/j.1460-](https://doi.org/10.1111/j.1460-9568.1993.tb00536.x)  
610 [9568.1993.tb00536.x](https://doi.org/10.1111/j.1460-9568.1993.tb00536.x)
- 611 Hillebrand, A., Barnes, G.R., 2002. A quantitative assessment of the sensitivity of whole-head  
612 MEG to activity in the adult human cortex. *Neuroimage* 16, 638–650.  
613 <https://doi.org/10.1006/nimg.2002.1102>

- 614 Hyvärinen, A., Oja, E., 2000. Independent Component Analysis: algorithms and applications.  
615 Neural Netw 13, 411–430. [https://doi.org/10.1016/S0893-6080\(00\)00026-5](https://doi.org/10.1016/S0893-6080(00)00026-5)
- 616 Ingram, J.N., Körding, K.P., Howard, I.S., Wolpert, D.M., 2008. The statistics of natural hand  
617 movements. Exp. Brain Res. 188, 223–236. <https://doi.org/10.1007/s00221-008-1355-3>
- 618 Jerbi, K., Lachaux, J.P., N'Diaye, K., Pantazis, D., Leahy, R.M., Garnero, L., Baillet, S., 2007.  
619 Coherent neural representation of hand speed in humans revealed by MEG imaging. Proc.  
620 Natl. Acad. Sci. U. S. A. 104, 7676–7681. <https://doi.org/10.1073/pnas.0609632104>
- 621 Kalogianni, K., Daffertshofer, A., van der Helm, F.C.T., Schouten, A.C., de Munck, J.C., 2018.  
622 Disentangling Somatosensory Evoked Potentials of the Fingers: Limitations and Clinical  
623 Potential. Brain Topogr. 31, 498–512. <https://doi.org/10.1007/s10548-017-0617-4>
- 624 Kamakura, N., Matsuo, M., Ishii, H., Mitsuboshi, F., Miura, Y., 1980. Patterns of static prehension  
625 in normal hands. Am. J. Occup. Ther. 34, 437–445. <https://doi.org/10.5014/ajot.34.7.437>
- 626 Kilteni, K., Andersson, B.J., Houborg, C., Ehrsson, H.H., 2018. Motor imagery involves predicting  
627 the sensory consequences of the imagined movement. Nat. Commun. 9.  
628 <https://doi.org/10.1038/S41467-018-03989-0>
- 629 Kinoshita, H., Murase, T., Bandou, T., 1996. Grip posture and forces during holding cylindrical  
630 objects with circular grips. Ergonomics 39, 1163–1176.  
631 <https://doi.org/10.1080/00140139608964536>
- 632 Kita, Y., Mori, A., Nara, M., 2001. Two types of movement-related cortical potentials preceding  
633 wrist extension in humans. Neuroreport 12, 2221–2225. [https://doi.org/10.1097/00001756-](https://doi.org/10.1097/00001756-200107200-00035)  
634 [200107200-00035](https://doi.org/10.1097/00001756-200107200-00035)
- 635 Larson, E., Taulu, S., 2018. Reducing Sensor Noise in MEG and EEG Recordings Using  
636 Oversampled Temporal Projection. IEEE Trans. Biomed. Eng. 65.



- 637 <https://doi.org/10.1109/TBME.2017.2734641>
- 638 Leo, A., Handjaras, G., Bianchi, M., Marino, H., Gabiccini, M., Guidi, A., Scilingo, E.P., Pietrini,  
639 P., Bicchi, A., Santello, M., Ricciardi, E., 2016. A synergy-based hand control is encoded in  
640 human motor cortical areas. *Elife* 5. <https://doi.org/10.7554/eLife.13420>
- 641 Martuzzi, R., van der Zwaag, W., Farthouat, J., Gruetter, R., Blanke, O., 2014. Human finger  
642 somatotopy in areas 3b, 1, and 2: A 7T fMRI study using a natural stimulus. *Hum. Brain*  
643 *Mapp.* 35, 213–226. <https://doi.org/10.1002/hbm.22172>
- 644 Marty, B., Bourguignon, M., Op de Beeck, M., Wens, V., Goldman, S., Van Bogaert, P., Jousmäki,  
645 V., De Tiège, X., 2015. Effect of movement rate on corticokinematic coherence. *Neurophysiol.*  
646 *Clin.* 45, 469–474. <https://doi.org/10.1016/j.neucli.2015.09.002>
- 647 Marty, B., Naeije, G., Bourguignon, M., Wens, V., Jousmäki, V., Lynch, D.R., Gaetz, W.,  
648 Goldman, S., Hari, R., Pandolfo, M., De Tiège, X., 2019. Evidence for genetically determined  
649 degeneration of proprioceptive tracts in Friedreich ataxia. *Neurology* 93, E116–E124.  
650 <https://doi.org/10.1212/WNL.00000000000007750>
- 651 Massey, F.J., 1951. The Kolmogorov-Smirnov Test for Goodness of Fit. *J. Am. Stat. Assoc.* 46, 68–  
652 78. <https://doi.org/10.1080/01621459.1951.10500769>
- 653 McKiernan, B.J., Marcario, J.K., Karrer, J.H., Cheney, P.D., 1998. Corticomotoneuronal postspike  
654 effects in shoulder, elbow, wrist, digit, and intrinsic hand muscles during a reach and  
655 prehension task. *J. Neurophysiol.* 80, 1961–1980. <https://doi.org/10.1152/jn.1998.80.4.1961>
- 656 Miller, K.J., Schalk, G., Fetz, E.E., Den Nijs, M., Ojemann, J.G., Rao, R.P.N., 2010. Cortical  
657 activity during motor execution, motor imagery, and imagery-based online feedback. *Proc.*  
658 *Natl. Acad. Sci. U. S. A.* 107, 4430–4435. <https://doi.org/10.1073/pnas.0913697107>
- 659 Nakamura, A., Yamada, T., Goto, A., Kato, T., Ito, K., Abe, Y., Kachi, T., Kakigi, R., 1998.

- 660 Somatosensory homunculus as drawn by MEG. *Neuroimage* 7, 377–386.
- 661 <https://doi.org/10.1006/nimg.1998.0332>
- 662 Nierula, B., Hohlefeld, F.U., Curio, G., Nikulin, V. V., 2013. No somatotopy of sensorimotor alpha-  
663 oscillation responses to differential finger stimulation. *Neuroimage* 76, 294–303.
- 664 <https://doi.org/10.1016/j.neuroimage.2013.03.025>
- 665 Oldfield, R.C., 1971. The assessment and analysis of handedness: The Edinburgh inventory.  
666 *Neuropsychologia* 9, 97–113. [https://doi.org/10.1016/0028-3932\(71\)90067-4](https://doi.org/10.1016/0028-3932(71)90067-4)
- 667 Oostenveld, R., Fries, P., Maris, E., Schoffelen, J.M., 2011. FieldTrip: Open source software for  
668 advanced analysis of MEG, EEG, and invasive electrophysiological data. *Comput. Intell.*  
669 *Neurosci.* 2011. <https://doi.org/10.1155/2011/156869>
- 670 Penfield, W., Boldery, E., 1937. Somatic motor and sensory representation in the cerebral cortex of  
671 man as studied by electrical stimulation. *Brain* 60, 389–443.
- 672 <https://doi.org/10.1093/brain/60.4.389>
- 673 Penfield, W., Rasmussen, T., 1950. The Cerebral Cortex of Man: A Clinical Study of Localization  
674 of Function. *J. Am. Med. Assoc.* 144, 1412.
- 675 <https://doi.org/10.1001/jama.1950.02920160086033>
- 676 Piitulainen, H., Bourguignon, M., De Tiège, X., Hari, R., Jousmäki, V., 2013a. Coherence between  
677 magnetoencephalography and hand-action-related acceleration, force, pressure, and  
678 electromyogram. *Neuroimage* 72, 83–90. <https://doi.org/10.1016/j.neuroimage.2013.01.029>
- 679 Piitulainen, H., Bourguignon, M., De Tiège, X., Hari, R., Jousmäki, V., 2013b. Corticokinematic  
680 coherence during active and passive finger movements. *Neuroscience* 238, 361–370.
- 681 <https://doi.org/10.1016/j.neuroscience.2013.02.002>
- 682 Piitulainen, H., Bourguignon, M., Hari, R., Jousmäki, V., 2015. MEG-compatible pneumatic

- 683 stimulator to elicit passive finger and toe movements. *Neuroimage* 112, 310–317.
- 684 <https://doi.org/10.1016/J.NEUROIMAGE.2015.03.006>
- 685 Piitulainen, H., Illman, M., Laaksonen, K., Jousmäki, V., Forss, N., 2018a. Reproducibility of  
686 corticokinematic coherence. *Neuroimage* 179, 596–603.
- 687 <https://doi.org/10.1016/J.NEUROIMAGE.2018.06.078>
- 688 Piitulainen, H., Illman, M.J., Jousmäki, V., Bourguignon, M., 2020. Feasibility and reproducibility  
689 of electroencephalography-based corticokinematic coherence. *J. Neurophysiol.*
- 690 Piitulainen, H., Seipäjärvi, S., Avela, J., Parviainen, T., Walker, S., 2018b. Cortical Proprioceptive  
691 Processing Is Altered by Aging. *Front. Aging Neurosci.* 10, 147.
- 692 <https://doi.org/10.3389/fnagi.2018.00147>
- 693 Reilly, K.T., Hammond, G.R., 2000. Independence of force production by digits of the human hand.  
694 *Neurosci. Lett.* 290, 53–56. [https://doi.org/10.1016/S0304-3940\(00\)01328-8](https://doi.org/10.1016/S0304-3940(00)01328-8)
- 695 Rossini, P.M., Tecchio, F., Pizzella, V., Lupoi, D., Cassetta, E., Paqualetti, P., 2001.  
696 Interhemispheric differences of sensory hand areas after monohemispheric stroke: MEG/MRI  
697 integrative study. *Neuroimage* 14, 474–485. <https://doi.org/10.1006/nimg.2000.0686>
- 698 Rossini, P.M., Tecchio, F., Pizzella, V., Lupoi, D., Cassetta, E., Pasqualetti, P., Romani, G.L.,  
699 Orlacchio, A., 1998. On the reorganization of sensory hand areas after mono-hemispheric  
700 lesion: A functional (MEG)/anatomical (MRI) integrative study. *Brain Res.* 782, 153–166.  
701 [https://doi.org/10.1016/S0006-8993\(97\)01274-2](https://doi.org/10.1016/S0006-8993(97)01274-2)
- 702 Schaefer, M., Mühlnickel, W., Grüsser, S.M., Flor, H., 2002. Reproducibility and stability of  
703 neuroelectric source imaging in primary somatosensory cortex. *Brain Topogr.* 14, 179–189.  
704 <https://doi.org/10.1023/A:1014598724094>
- 705 Schieber, M.H., Gardinier, J., Liu, J., 2001. Tension Distribution to the Five Digits of the Hand by

- 706 Neuromuscular Compartments in the Macaque Flexor Digitorum Profundus.
- 707 Simões, C., Mertens, M., Forss, N., Jousmäki, V., Lütkenhöner, B., Hari, R., 2001. Functional  
708 Overlap of Finger Representations in Human SI and SII Cortices. *J. Neurophysiol.* 86, 1661–  
709 1665.
- 710 Smeds, E., Vanhatalo, S., Piitulainen, H., Bourguignon, M., Jousmäki, V., Hari, R., 2017.  
711 Corticokinematic coherence as a new marker for somatosensory afference in newborns. *Clin.*  
712 *Neurophysiol.* 128, 647–655. <https://doi.org/10.1016/j.clinph.2017.01.006>
- 713 Swanson, A.B., Matev, I.B., De Groot, G., 1974. The strength of the hand. *Inter Clin. Inf. Bull.* 13,  
714 1–8. [https://doi.org/10.1016/0003-6870\(72\)90119-6](https://doi.org/10.1016/0003-6870(72)90119-6)
- 715 Szameitat, A.J., Shen, S., Sterr, A., 2006. Motor imagery of complex everyday movements. An  
716 fMRI study. <https://doi.org/10.1016/j.neuroimage.2006.09.033>
- 717 Taulu, S., Simola, J., 2006. Spatiotemporal signal space separation method for rejecting nearby  
718 interference in MEG measurements. *Phys. Med. Biol* 51, 1–10. [https://doi.org/10.1088/0031-](https://doi.org/10.1088/0031-9155/51/0/000)  
719 [9155/51/0/000](https://doi.org/10.1088/0031-9155/51/0/000)
- 720 Uematsu, S., Lesser, R., Fisher, R.S., Gordon, B., Hara, K., Krauss, G.L., Vining, E.P., Webber,  
721 R.W., 1992. Motor and sensory cortex in humans: Topography studied with chronic subdural  
722 stimulation. *Neurosurgery* 31, 59–72. <https://doi.org/10.1227/00006123-199207000-00009>
- 723 Virtanen, P., Gommers, R., Oliphant, T.E., Haberland, M., Reddy, T., Cournapeau, D., Burovski,  
724 E., Peterson, P., Weckesser, W., Bright, J., van der Walt, S.J., Brett, M., Wilson, J., Millman,  
725 K.J., Mayorov, N., Nelson, A.R.J., Jones, E., Kern, R., Larson, E., Carey, C.J., Polat, İ., Feng,  
726 Y., Moore, E.W., VanderPlas, J., Laxalde, D., Perktold, J., Cimrman, R., Henriksen, I.,  
727 Quintero, E.A., Harris, C.R., Archibald, A.M., Ribeiro, A.H., Pedregosa, F., van Mulbregt, P.,  
728 Vijaykumar, A., Bardelli, A. Pietro, Rothberg, A., Hilboll, A., Kloeckner, A., Scopatz, A., Lee,

729 A., Rokem, A., Woods, C.N., Fulton, C., Masson, C., Häggström, C., Fitzgerald, C.,  
730 Nicholson, D.A., Hagen, D.R., Pasechnik, D. V., Olivetti, E., Martin, E., Wieser, E., Silva, F.,  
731 Lenders, F., Wilhelm, F., Young, G., Price, G.A., Ingold, G.L., Allen, G.E., Lee, G.R.,  
732 Audren, H., Probst, I., Dietrich, J.P., Silterra, J., Webber, J.T., Slavič, J., Nothman, J.,  
733 Buchner, J., Kulick, J., Schönberger, J.L., de Miranda Cardoso, J.V., Reimer, J., Harrington, J.,  
734 Rodríguez, J.L.C., Nunez-Iglesias, J., Kuczynski, J., Tritz, K., Thoma, M., Newville, M.,  
735 Kümmerer, M., Bolingbroke, M., Tartre, M., Pak, M., Smith, N.J., Nowaczyk, N., Shebanov,  
736 N., Pavlyk, O., Brodtkorb, P.A., Lee, P., McGibbon, R.T., Feldbauer, R., Lewis, S., Tygier, S.,  
737 Sievert, S., Vigna, S., Peterson, S., More, S., Pudlik, T., Oshima, T., Pingel, T.J., Robitaille,  
738 T.P., Spura, T., Jones, T.R., Cera, T., Leslie, T., Zito, T., Krauss, T., Upadhyay, U.,  
739 Halchenko, Y.O., Vázquez-Baeza, Y., 2020. SciPy 1.0: fundamental algorithms for scientific  
740 computing in Python. *Nat. Methods* 17, 261–272. <https://doi.org/10.1038/s41592-019-0686-2>

741 Wright, D.J., Holmes, P., Di Russo, F., Loporto, M., Smith, D., 2012. Reduced Motor Cortex  
742 Activity during Movement Preparation following a Period of Motor Skill Practice. *PLoS One*  
743 7, e51886. <https://doi.org/10.1371/journal.pone.0051886>

744 Zatsiorsky, V.M., Li, Z.M., Latash, M.L., 1998. Coordinated force production in multi-finger tasks:  
745 Finger interaction and neural network modeling. *Biol. Cybern.* 79, 139–150.  
746 <https://doi.org/10.1007/s004220050466>

747
